1 Gene-experience correlation during cognitive development:  
2 Evidence from the Adolescent Brain Cognitive Development (ABCD) Study<sup>SM</sup>  
3

4 Robert J. Loughnan<sup>1</sup>, Clare E. Palmer<sup>2</sup>, Wesley K. Thompson<sup>3</sup>, Anders M. Dale<sup>1,4,5,6,7</sup>, Terry L.  
5 Jernigan<sup>1,2,5,7\*</sup>, Chun Chieh Fan<sup>2,4\*</sup>  
6

- 7 1. Department of Cognitive Science, University of California, San Diego, 9500 Gilman  
8 Drive, La Jolla, CA 92093, USA
- 9 2. Center for Human Development, University of California, San Diego, 9500 Gilman  
10 Drive, La Jolla, CA 92161, USA
- 11 3. Herbert Wertheim School of Public Health, University of California, San Diego, La Jolla,  
12 CA, USA
- 13 4. Center for Multimodal Imaging and Genetics, University of California, San Diego School  
14 of Medicine, 9444 Medical Center Dr, La Jolla, CA 92037, USA
- 15 5. Department of Radiology, University of California, San Diego School of Medicine, 9500  
16 Gilman Drive, La Jolla, CA 92037, USA
- 17 6. Department of Neuroscience, University of California, San Diego School of Medicine,  
18 9500 Gilman Drive, La Jolla, CA 92037, USA
- 19 7. Department of Psychiatry, University of California, San Diego School of Medicine, 9500  
20 Gilman Drive, La Jolla, CA 92037, USA  
21  
22  
23  
24

25 **Running Title:** Gene-experience interplay in cognitive development  
26  
27

28 **\* Shared Corresponding, equal contribution**  
29

30 **Conflict of Interest Statement**

31 Dr. Dale reports that he was a Founder of and holds equity in CorTechs Labs, Inc., and serves on  
32 its Scientific Advisory Board. He is a member of the Scientific Advisory Board of Human  
33 Longevity, Inc. He receives funding through research grants from GE Healthcare to UCSD. The  
34 terms of these arrangements have been reviewed by and approved by UCSD in accordance with  
35 its conflict of interest policies. All other authors have no conflicts to disclose.

36  
37 **Word count:** 5,594

38 **Abstract**

39 **Background:** Findings in adults have shown more culturally sensitive ‘crystallized’ measures of  
40 intelligence have greater heritability, these results were not able to be shown in children.

41 **Methods:** With data from 8,518 participants, aged 9 to 11, from the Adolescent Brain Cognitive  
42 Development (ABCD) Study<sup>®</sup>, we used polygenic predictors of intelligence test performance  
43 (based on genome-wide association meta-analyses of data from 269,867 individuals) and of  
44 educational attainment (based on data from 1.1 million individuals), associating these predictors  
45 with neurocognitive performance. We then assessed the extent of mediation of these associations  
46 by a measure of recreational reading.

47 **Results:** more culturally sensitive ‘crystallized’ measures were more strongly associated with the  
48 polygenic predictors than were less culturally sensitive ‘fluid’ measures. This mirrored  
49 heritability differences reported previously in adults and suggests similar associations in  
50 children. Recreational reading more strongly statistically mediated the genetic associations with  
51 crystallized than those with fluid measures of cognition.

52 **Conclusion:** This is consistent with a prominent role of gene-environment correlation in  
53 cognitive development measured by “crystallized” intelligence tests. Such experiential mediators  
54 may represent malleable targets for improving cognitive outcomes.

55

56

57

58

## 59 Introduction

60 Scores on cognitive tests in both children and adults have been linked to long term  
61 outcomes and to genetic variation(1–4). Some cognitive tests, e.g., those requiring literacy and  
62 mathematical skills, depend upon and are more sensitive to variability in cultural and socio-  
63 economic factors. These measures are often referred to as ‘crystallized’ intelligence measures.  
64 In contrast, other tests that tap the capacity to solve novel problems, or process novel  
65 information, often referred to as ‘fluid’ measures, are less culturally sensitive and are less  
66 strongly related to socio-economic variables(5,6). A recent review reported systematic  
67 differences in heritability (an estimate of trait variability attributable to genetic variation) of the  
68 traits measured by these different kinds of cognitive measures(7). Surprisingly, in studies of  
69 adult twins, more culturally sensitive tests exhibited higher, rather than lower, heritability; which  
70 runs counter to predictions from conventional models of intelligence. The authors described  
71 similar trends in the twin studies of children, but increased heritability of crystallized relative to  
72 fluid measures have not yet been established for children, in whom intellectual functions are  
73 continuing to mature.

74 The finding that the measures most strongly influenced by cultural factors exhibit higher  
75 heritability is perhaps counterintuitive; however previous authors have noted that genetic  
76 variation can be associated with environmental, cultural, or experiential (ECE) factors that  
77 themselves amplify effects of a genotype on the phenotype, a phenomenon often referred to as  
78 rGE (gene-environment correlation). These associations between genotypes and ECE factors  
79 could influence the development of cognitive and intellectual abilities in several ways. As an  
80 example, if others in the social environments of children recognize traits, e.g., precocious  
81 behavior, in those with a genetic propensity for a given cognitive ability, they may begin to treat

82 such individuals differently, rewarding them disproportionately for intellectual pursuits,  
83 investing more in their instruction, and/or placing them in environments that drive learning more  
84 effectively. Alternatively, the associations can be driven by the motivation of the children  
85 themselves if for example they develop greater enthusiasm for intellectual activities for which  
86 they have been more frequently rewarded, and which they then pursue more assiduously, thus  
87 enjoying beneficial effects of the increased practice associated with these activities. In either  
88 case, the genetically advantaged abilities are disproportionately enhanced by these mediating  
89 ECE factors. Of course, individuals with less advantageous genotypes may experience the  
90 converse of these social and motivational effects, resulting in languishing, or in the worst case  
91 suppressed, intellectual development, even within similar environments. Such rGE effects can  
92 increase variance in intellectual phenotypes and increase estimates of heritability using both  
93 epidemiological and genomic methods(8). The important implication is that a component of this  
94 increased heritability requires the mediating ECE effects for its expression. In essence, more  
95 direct biological effects of the genotype *and* associated differences in the environments or  
96 experiences of the child are both contributing causal factors influencing the mature phenotype,  
97 but they act through dissociable mechanisms.

98 Heritability is a population statistic frequently measured using a twin design. For this  
99 study, we used polygenic scores to examine variation in genetic and experiential factors and their  
100 relationship to trait measures of cognitive function. Polygenic scores have the advantage that  
101 they can be used to index relevant genetic factors in samples of unrelated individuals by  
102 leveraging the statistical power of meta-analysis results from large Genome Wide Association  
103 Studies (GWAS). Using neurocognitive test scores, genomic data, and a measure of parent-  
104 reported recreational reading assessed in a large sample of 8,618 children, aged 9 to 11, from the

105 ABCD Study®, we used polygenic scores of intelligence test performance (based on GWAS of  
106 269,867 individuals(9)) and educational attainment, sometimes considered a proxy for  
107 intellectual ability (based on 1.1 million individuals(10)), to ask 3 questions: First, do these  
108 genomic predictors account for more of the variability in estimates of culturally sensitive  
109 crystallized traits than fluid traits in children, as might be expected from reports of higher  
110 heritability in adult twins? Second, does a parent-reported estimate of the time their children  
111 spend reading for pleasure mediate the relationship between a genomic predictor and measures  
112 of cognitive performance, consistent with a role of this experiential enhancer of performance in  
113 increasing heritability? Third, if mediation is observed, is this mediating effect larger for the  
114 culturally sensitive crystallized than the fluid measures of cognitive performance, consistent with  
115 a role for rGE in the higher heritability of these measures?

116 In additional analyses, we examined the degree to which the findings in the ethnically  
117 diverse ABCD sample were similar between the subgroup of children with high genomic  
118 European ancestry (EurA) and a remaining subgroup of children who were from diverse ancestry  
119 groups (DivA). Finally, using simulations, we tested whether our observed findings may be due  
120 to previously reported differences in test-retest reliabilities (for crystallized vs fluid measures).

121

## 122 **Materials and Methods**

### 123 *2.1 Data available in the ABCD data release 2.0.1*

124 The ABCD study (<http://abcdstudy.org>) enrolled the families of 11,875 children aged 9 or  
125 10 years at baseline(11). This longitudinal study follows the development of these children at 21  
126 sites across the US for ten years. The cohort exhibits a large degree of sociodemographic  
127 diversity. Exclusion criteria were limited to: 1) lack of English proficiency; 2) the presence of

128 severe sensory, neurological, medical or intellectual limitations that would inhibit the child's  
129 ability to comply with the protocol; 3) an inability to complete an MRI scan at baseline. The  
130 study protocols are approved by the University of California, San Diego Institutional Review  
131 Board(12). Parent/caregiver permission and child assent from each participant were obtained.  
132 Here, our data were drawn from the baseline assessments shared in ABCD release 2.0.1 (NDAR  
133 DOI: 10.15154/1504041).

134

### 135 2.1.1 Cognitive Measures

136 Seven of the 10 cognitive tasks were subtests from The NIH Toolbox Cognition Battery<sup>®</sup>  
137 (NTCB) in the version recommended for ages 7+ (<http://www.nihtoolbox.org>)(13). The average  
138 time to complete this battery is approximately 35 minutes. The NTCB was administered in  
139 English(14), using an iPad, with support from a research assistant when needed. The battery  
140 yields individual test scores measuring specific constructs and composite scores that have been  
141 shown to be highly correlated with 'gold standard' measures of intelligence in adults(15) and  
142 children(5). Here, all 7 individual test scores and 2 composite scores were examined: the  
143 Crystallized Cognition Composite Score (derived from scores on the Picture Vocabulary and  
144 Oral Reading Recognition measures) and the Fluid Cognition Composite Score (derived from the  
145 remaining measures). Additionally, three neurocognitive tasks were used that were not  
146 components of the NTCB: Rey-Auditory Learning Task, Little Man Task and Matrix Reasoning.  
147 Please see supplementary materials for a description of each task.

148

### 149 2.1.2 Latent Neurocognitive Factors

150 Thompson et al. derived a three factor, varimax rotated, solution for the latent structure  
151 across the neurocognitive battery in ABCD using Bayesian Probabilistic PCA(16). The final  
152 latent factor solution included the measures described above, except for the Matrix Reasoning  
153 task which had very little effect on the solution. The factors will be referred to as Bayesian  
154 Factors (BF) 1-3. Language tasks loaded most heavily on BF1, which was highly correlated with  
155 the Crystallized Composite ( $r=0.93$ ); executive functioning tasks loaded most heavily on BF2;  
156 and learning/memory tasks loaded heavily on BF3.

157

### 158 *2.1.3 Recreational Reading*

159 Parents of ABCD participants were asked to complete a survey of their children's  
160 activities. One question asked, "Does your child read for pleasure?" The follow-up question  
161 was, "About how many hours per week does your child read for pleasure?". This estimate of  
162 number of hours of recreational reading was log transformed due to skewness. To confine the  
163 analyses of this variable to a homogenous group of children who read for pleasure, we included  
164 only children whose parents answered 'yes' to the first question.

165

### 166 *2.1.4 Genetic Data and Computing Polygenic Scores*

167 Using genotype data we derived genetic ancestry using fastStructure(17) with four  
168 ancestry groups. Genetic principal components were also calculated using PLINK. Variants were  
169 imputed using the Michigan Imputation Server(18). Polygenic scores were computed using  
170 PRSice(19). The Intelligence Polygenic Score (IPS) was trained on 269,867 individuals by  
171 Savage et al.(9), and focused on neurocognitive tests considered to gauge fluid intelligence. The  
172 Education Attainment Polygenic Score (EAPS) was generated from 1.1 million individuals,

173 predicting the phenotype of number of years of schooling completed. Please see supplementary  
174 materials for further details on genetic data and analysis.

175 We were primarily focused on studying the IPS association with cognitive tests in  
176 ABCD, due to it being trained on a more directly relevant phenotype. However, we additionally  
177 examined EAPS as a secondary analysis for comparison as it has been previously used as a proxy  
178 for cognitive ability and has a discovery sample size four times the size of the IPS.

179

## 180 *2.2 Analytic Methods*

181

### 182 *2.2.1 Ancestry Group Analyses*

183 Training and testing polygenic scores in different ancestry groups has been shown to  
184 reduce predictive power(20–22). Given the ancestry differences between the polygenic score  
185 discovery samples (predominantly European) and the ABCD study (multiple ancestry groups),  
186 we wanted to confirm our main results in the full samples were not driven by population  
187 structure. As such we additionally performed analyses in two subsamples: 1) children with  
188 estimated proportion of European ancestry higher than 90% (EurA) and 2) a group of the  
189 remaining children with diverse ancestry, which included those from other or mixed ancestry  
190 (DivA).

191

### 192 *2.2.2 Statistical Model for Genomic Prediction of Behavioral Measures*

193 To assess the association between the polygenic scores and cognitive performance in  
194 ABCD, we fit Generalized Linear Mixed-Effects Models (GLMMs) using the `gamm4`  
195 package(23) in R. Each model predicted performance on a different cognitive measure.



196 Continuous variables were z-scored before model fitting to allow coefficients to be interpreted as  
197 standardized effect sizes. To test if regression coefficients differed between regressions we  
198 performed a z-test on the difference between coefficients, based on the propagated standard error  
199 for the two regression coefficients as the sum of the error of variances for each measure. This test  
200 assumes the standard errors are uncorrelated and so provides a conservative estimate of  
201 significance. Please see supplementary materials for details and covariates used.

202

### 203 *2.2.3 Differential Mediation Analysis*

204 To assess whether recreational reading is a plausible ECE factor increasing heritability of  
205 crystallized cognition, through rGE effects, we performed a mediation analysis. Specifically, we  
206 compared the statistical mediation effects of recreational reading experience on the associations  
207 between the IPS and both the Crystallized Composite and Fluid Composite, respectively. We  
208 achieved this by calculating the proportion of mediation of recreational reading on the i) IPS-  
209 crystallized and the ii) IPS-fluid associations using an average causal mediation effect model(24)  
210 across 10,000 bootstrap samples. With bootstrapped samples we tested if the mediation effect of  
211 recreational reading on the IPS-crystallized association was greater than that of IPS-fluid , by  
212 performing a Welch t-test on the samples. Mediation analysis was performed using general linear  
213 models in the mediation package in R(25), see supplementary materials for details.

214

### 215 *2.2.4 Data and Code Availability*

216 The ABCD dataset is available approved researchers at <https://nda.nih.gov/abcd>. A  
217 jupyter notebook of the analysis be found at  
218 [github.com/robloughnan/ABCD\\_Intelligence\\_Polygenic\\_Score](https://github.com/robloughnan/ABCD_Intelligence_Polygenic_Score).

219

## 220 Results

### 221 *Demographics*

222 Figure 1 illustrates a flow-chart for sample selection. For the final analysis we have  
223 8,518 individuals in the full sample, 4,885 in the EurA sample and 3,633 in the DivA sample.

### 224 *Behavioral Measures and Sociocultural Factors*

225 Mean performance, standard deviation (SD), median and estimates of variance explained  
226 by age, sex, and the set of socio-cultural covariates (parental marital status, highest education  
227 level of parent/caregiver, household income, ethnicity, genetic principal components) are given  
228 for each behavioral measure examined in Table 2. Consistent with previous reports, there are  
229 substantial differences in the degree to which socio-cultural factors account for variability in  
230 these measures. The Crystallized Composite, its constituent Picture Vocabulary and Reading  
231 Recognition measures, and BF1, on which these measures of language and literacy load heavily,  
232 all exhibit higher levels of association with socio-cultural variables. This pattern persisted when  
233 controlling for IPS (Sup. Table 2). Sex, age and socio-cultural factors explained little variability  
234 in recreational reading. Partial correlations between the individual cognitive task measures  
235 controlling for covariates (Figure 2), suggest that performance on the different tasks is modestly  
236 correlated across children ( $r_s=.08-.41$ ) in this sample. Correlations peak in the .3 range within  
237 Fluid Composite measures, and the highest correlation is observed between the two Crystallized  
238 Composite measures (Picture Vocabulary and Oral Reading  $r=.41$ ).

239

### 240 *Genomic Prediction of Crystallized and Fluid Cognition Measures*

241 Table 3 summarizes the regression results for predicting the Crystallized and Fluid  
242 Composites with IPS or EAPS in the full sample, and separately in the EurA and DivA  
243 subsamples. The IPS was a significant predictor of both measures in all analyses. Importantly,  
244 the standardized regression coefficient was significantly higher for the Crystallized than the  
245 Fluid Composite regardless of ancestry group (full sample:  $z=4.8$ ,  $p=1.8 \times 10^{-6}$ , EurA:  $z=4.6$ ,  
246  $p=5.1 \times 10^{-6}$  and DivA:  $z=2.5$ ,  $p=1.4 \times 10^{-2}$ ).

247 In no case did the EAPS, despite a much larger training sample size, appear to account  
248 for more of the variance in the neurocognitive measures than did IPS. However, across ancestry  
249 groups and for both composite scores, combining both genomic predictors explained  
250 significantly more variance in behavior than IPS alone (supplementary results). IPS + EAPS  
251 explained 5.8% variance ( $p=4.5 \times 10^{-64}$ ) in the Crystallized Composite for EurA (a 40% increase  
252 compared to IPS alone). Supplementary Tables 3-8 show regression results for each behavior  
253 using IPS, EAPS and IPS + EAPS within each ancestry group.

254 Fitting separate regression models for each individual task in the neurocognitive battery,  
255 we found that the IPS was a significant predictor for each cognitive measure for the full sample  
256 and the EurA subsample (all  $p$  values  $< 10^{-3}$ ), surviving the Bonferroni-corrected significance  
257 threshold of  $0.05/10=0.005$ . Within the DivA subsample only six of the ten tasks were  
258 individually significantly predicted by the IPS (Sup. Table 8). Figure 3 shows the standardized  
259 regression coefficients of IPS predicting performance on each task, as well as the Crystallized  
260 and Fluid Composite measures from the NTCB and Bayesian Factors 1-3(16), in the full sample.  
261 Individual cognitive measures included in the Crystallized Composite have consistently higher  
262 IPS standardized regression weights than the measures included in the Fluid Composite. Other  
263 neurocognitive tasks from the ABCD battery (shaded in gray) showed similar associations to the

264 Fluid Composite. The results for the Bayesian Factors mirrored these results: BF1, on which  
265 ‘Crystallized’ measures had the highest factor loadings (Sup. Figure 1)(16), displayed a stronger  
266 association with IPS than BF2 and BF3 on which ‘Fluid’, executive function and memory  
267 measures had higher loadings. The results in the subsamples (EurA and DivA) are provided in  
268 supplemental material.

269

### 270 *Differential Mediation Results*

271 The mediation analysis showed that recreational reading partially mediated associations  
272 between IPS and both composite measures, proportions of mediation: fluid 0.084 (95% CI:  
273 0.047-0.14,  $p \leq 10^{-4}$ ), crystallized 0.12 (95% CI: 0.088-0.16,  $p \leq 10^{-4}$ ). However, the differential  
274 mediation analyses revealed a highly significant difference between the large degree of  
275 attenuation of the association between IPS and the Crystallized Composite relative to that  
276 between IPS and the Fluid Composite (Welch t-test:  $t=125$ ,  $df=19053$ ,  $p < 10^{-300}$ ), shown in Figure  
277 4.

278

### 279 *Sensitivity Analyses to Address Test Reliability*

280 A previous study reported the test-retest reliability for the Fluid Composite from the  
281 NTCB (.76) was somewhat lower than for the Crystallized Composite (.85)(5), raising questions  
282 about whether differences in the strength of their associations with IPS could be attributed to  
283 more noise in the Fluid Composite measure. In supplementary sensitivity analyses we  
284 demonstrate that our results are robust to the addition of simulated noise to the Crystallized  
285 Composite that mimics this difference in test reliability. At this level of simulated noise we  
286 estimated 1.0 power ( $\alpha=0.05$ ) to detect  $Cryst_{noise}$  having a significantly greater IPS

287 standardized regression coefficient than the Fluid Composite. Moreover, additional sensitivity  
288 analyses indicate that the observed differences in the mediation effects of recreational reading  
289 are similarly robust against potential measurement error modelled as random noise. These  
290 analyses are described in detail in Supplemental Material.

291

## 292 Discussion

293 We have shown that polygenic predictors of intelligence test performance and of  
294 educational attainment are associated with neurocognitive performance in this large group of  
295 children from diverse backgrounds. These results are consistent with previous findings  
296 demonstrating that virtually all behavioral traits, including cognitive and intellectual phenotypes,  
297 are heritable(26). Moderate estimates of heritability of many behavioral phenotypes also  
298 establish that a substantial portion of the variability is due to independent environmental  
299 influences. Given that behavioral phenotypes emerge through interactions between children and  
300 their physical, social, and cultural environments, much attention has been paid to how these  
301 environmental factors modify the phenotypes, since they are presumably the malleable factors.  
302 However, recently, more attention has been focused on the possible roles of mediating  
303 nongenetic (ECE) factors that, through their statistical association with genetic variation (rGE),  
304 may amplify heritability(7,8).

305 We found that a culturally dependent estimate of crystallized cognitive functions, the  
306 Crystallized Composite measure from the NTCB, is more strongly associated with the best  
307 available polygenic predictor of intelligence test performance than is the Fluid Composite  
308 measure, consistent with earlier findings in adults of heritability differences(7) and polygenic  
309 score performance(27) across similar measures. This is despite the IPS being based on a large

310 meta-analysis of GWAS combining cognitive measures that were described by the authors as  
311 primarily “fluid intelligence” measures(9). Indeed, the relative size of the IPS association across  
312 the 15 measures examined here (Figure 2) closely mirrored the relative percent variance  
313 explained in these measures by socio-cultural variables (Table 2), a pattern that persists after  
314 accounting for IPS (Sup. Table2). Moreover, for children who read for pleasure, the extent of  
315 recreational reading was found to partially mediate the associations between IPS and both  
316 Composite measures, but to a significantly greater degree for the crystallized than for the fluid  
317 measure, consistent with a more prominent role of rGE in the development of abilities tapped by  
318 measures that are both more heritable, and apparently more sensitive to socio-cultural variables.  
319 In other words, even when controlling for *independent* contributions of more global sociocultural  
320 variables, how often a child reads for pleasure more strongly mediates the association between  
321 IPS and crystallized rather than in fluid performance.

322         It is perhaps unsurprising that recreational reading more strongly mediates the association  
323 between IPS and culturally sensitive measures of intelligence since such measures are generally  
324 sensitive to educational factors. Indeed, a measure of oral reading proficiency loads highly on  
325 both measures of crystallized functions examined here, Crystallized Composite and BF1. One  
326 can imagine that children with neurobehavioral phenotypes advantageous for learning to read  
327 might be more likely to develop the habit of reading for pleasure than those with other  
328 neurobehavioral phenotypes, for a variety of reasons. However, these results imply that choosing  
329 to read for pleasure at 10 years of age is associated with having a genotype linked to intellectual  
330 functions most dependent on reading, and that an estimate of the frequency of reading behavior  
331 mediates that link. This is consistent with previous descriptions of rGE effects, and with  
332 analyses by Beam and Turkheimer(8), who showed that increasing rGE over time could explain

333 observed increases in the heritability of measures of cognitive function through development.  
334 The ABCD study will provide an opportunity to measure changes in heritability at later time  
335 points of this longitudinal study. Importantly, despite the lower test-retest reliability of the fluid  
336 compared to the crystallized composite score from the NTCB(5), our supplementary analyses  
337 show that this difference in test reliability is unlikely to explain our findings.

338         Though recreational reading would appear to be an enhancing mediator of intellectual  
339 development, it is important to note that genotype-correlated ECE factors can also suppress  
340 intellectual development. As an example, early struggles to read by children with less  
341 advantageous genotypes for reading may decrease the likelihood that these children will choose  
342 reading activities, leading to slower progression of these faculties. Worse, if children’s early  
343 reading attempts are experienced very negatively, these children may develop avoidant responses  
344 to reading, which could result in active suppression of developing literacy. Importantly, when  
345 these kinds of differences originate with differences in children’s genotypes, they can increase  
346 heritability and exaggerate disparities. Identifying ECE factors that contribute to heritability of  
347 cognitive and intellectual phenotypes is important because it can point to practices that better  
348 adapt to neurogenetic diversity among children. Innovative pedagogical practices may lead to  
349 approaches that increase “enhancing” ECE effects in the subset of children disadvantaged by  
350 current practices and reduce ECE effects that suppress intellectual development and academic  
351 achievement, which may lead to more equitable educational outcomes.

352

### 353 *Limitations and Caveats*

354         The proportion of variance in the cognitive measures accounted for by the genomic  
355 predictors was larger in the EurA participants than in the DivA group(Sup. Tables 5 & 7), as

356 would be expected given the discovery samples were in individuals of European ancestry.  
357 However, the patterns were generally similar in the DivA group. This suggests similar genetic  
358 architecture for these cognitive phenotypes across ancestry groups and supports the validity of  
359 the results from the full sample. Analyses in all three groups included as covariates the top ten  
360 genetic principal components derived from the full sample. Because of broad ancestral diversity  
361 in the ABCD cohort, there is limited power for comparing the effects in different ancestry  
362 groups. As has been discussed in genetics generally(28,29), the lower predictive performance in  
363 the DivA group once again underscores the importance of collecting genetic data from  
364 ancestrally diverse populations and developing methods that can be used across ancestry groups.

365 One may have predicted that EAPS would have been a more powerful predictor of  
366 cognitive measures in ABCD than IPS, due to it having over 4 times the discovery sample size.  
367 However, we found generally the IPS had stronger associations (Sup. Tables 3-8), perhaps  
368 because the phenotype is a better match between training and testing. This contrasts with results  
369 of a previous study of adults, where EAPS explained 7-10% of the variance in cognition(10),  
370 while IPS explained only 2-5%(9). This discrepancy may be due to methodological differences,  
371 alternatively the young age of the cohort may be the key difference. Educational attainment,  
372 while clearly related to scores on cognitive tests, may be influenced by other genetically  
373 influenced traits (e.g. personality) that may contribute to greater persistence in formal education;  
374 thus the EAPS is likely to reflect to a greater degree these traits. Such pleiotropic of EAPS  
375 effects has been observed in adults(30). When we include both EAPS and IPS in a single model,  
376 together they explain 5.8% of the variability in the Crystallized Composite (EurA, Sup. Table 6),  
377 substantially more than IPS alone explains (4.1%), indicating that these genomic predictors



378 capture unique sources of the relevant variance, and are likely measuring different (relevant)  
379 constructs.

380         These results are consistent with previous evidence for a role of genetic variation in  
381 developing cognitive functions, and they strengthen the evidence for rGE during cognitive  
382 development. However, it should be emphasized that the genomic predictors (together) account  
383 for only 4.15% of cognitive performance variance in the full sample. Furthermore, this was  
384 observed for the Crystallized Composite measure, the culturally sensitive measure hypothesized  
385 to exhibit increased genetic association as a result of rGE effects. The additive effects of  
386 potentially confounding sociocultural covariates, even controlling for IPS, accounted for 13.2%  
387 of the variability. For the Fluid Composite the genomic predictors together accounted for only  
388 1.1% of the variance, and sociocultural covariates accounted for almost 5%. Of note, even with  
389 the narrow 2 year age range in the cohort, age alone accounts for 10% of the variability in the  
390 Crystallized Composite and 7% in the Fluid Composite. These effects may reveal clues about a  
391 highly dynamic process of cognitive and intellectual development in children.

392         Finally, though the results of the mediation analysis focusing on recreational reading  
393 strengthen the plausibility that such ECE mediators associate with genotypes and increase  
394 genetic effects, these results do not prove a causal explanation, and none should be inferred. In  
395 the context of an observational study such as ABCD it is always possible that confounding  
396 variables not accounted for in the analysis are responsible for the mediation effect we observed.

397

398

399

400

401 Funding

402 This research was in part supported by the and National Institute of Mental Health under the  
403 award number, R01MH122688.

404 ABCD Acknowledgement

405 Data used in the preparation of this article were obtained from the **Adolescent Brain Cognitive**  
406 **Development** <sup>□</sup> **Study (ABCD Study** <sup>®</sup>) (<https://abcdstudy.org>), held in the NIMH Data Archive  
407 (NDA). This is a multisite, longitudinal study designed to recruit more than 10,000 children age  
408 9-10 and follow them over 10 years into early adulthood. The ABCD Study is supported by the  
409 National Institutes of Health and additional federal partners under award numbers:  
410 U01DA041022, U01DA041028, U01DA041048, U01DA041089, U01DA041106,  
411 U01DA041117, U01DA041120, U01DA041134, U01DA041148, U01DA041156,  
412 U01DA041174, U24DA041123, and U24DA041147

413 A full list of supporters is available at <https://abcdstudy.org/federal-partners/>. A listing of  
414 participating sites and a complete listing of the study investigators can be found at  
415 <https://abcdstudy.org/principal-investigators.html>. ABCD Study consortium investigators  
416 designed and implemented the study and/or provided data but did not necessarily participate in  
417 analysis or writing of this report. This manuscript reflects the views of the authors and may not  
418 reflect the opinions or views of the NIH or ABCD Study consortium investigators.  
419 The ABCD data repository grows and changes over time. The ABCD data used in this came  
420 from [NIMH Data Archive Digital Object Identifier (10.15154/1504041)].

421

422

423

424

## 425 Bibliography

426

- 427 1. Deary IJ, Gottfredson LS. Intelligence Predicts Health and Longevity, but Why? *Curr Dir*  
428 *Psychol Sci.* 2004;13(1):1–4.
- 429 2. Kuh D, Richards M, Hardy R, Butterworth S, Wadsworth MEJ. Childhood cognitive ability  
430 and deaths up until middle age: A post-war birth cohort study. *Int J Epidemiol.*  
431 2004;33(2):408–13.
- 432 3. Kell HJ, Lubinski D, Benbow CP. Who Rises to the Top? Early Indicators. *Psychol Sci.*  
433 2013;24(5):648–59.
- 434 4. Polderman TJC, Benyamin B, De Leeuw CA, Sullivan PF, Van Bochoven A, Visscher PM, et  
435 al. Meta-analysis of the heritability of human traits based on fifty years of twin studies.  
436 *Nat Genet [Internet].* 2015;47(7):702–9. Available from:  
437 <http://dx.doi.org/10.1038/ng.3285>
- 438 5. Akshoomoff N, Beaumont JL, Bauer PJ, Dikmen S. NIH Toolbox Cognitive Function Battery  
439 (CFB): Composite Scores of Crystallized, Fluid, and Overall Cognition. *Monogr Soc Res*  
440 *Child Dev.* 2013;78(4):119–32.
- 441 6. Akshoomoff N, Newman E, Thompson WK, McCabe C, Frazier JA, Gruen JR, et al. The NIH  
442 Toolbox Cognition Battery: Results from a Large Normative Developmental Sample  
443 (PING). *Neuropsychology.* 2014;28(1):1–10.
- 444 7. Kan KJ, Wicherts JM, Dolan C V., van der Maas HLJ. On the Nature and Nurture of  
445 Intelligence and Specific Cognitive Abilities: The More Heritable, the More Culture  
446 Dependent. *Psychol Sci.* 2013;24(12):2420–8.
- 447 8. Burgess A, Shah K, Hough O, Hynynen K. Phenotype–environment correlations in  
448 longitudinal twin models. *Dev Psychopathol.* 2013;25(1):7–16.
- 449 9. Savage JE, Jansen PR, Stringer S, Watanabe K, Bryois J, De Leeuw CA, et al. Genome-wide  
450 association meta-analysis in 269,867 individuals identifies new genetic and functional  
451 links to intelligence. *Nat Genet.* 2018;50(7):912–9.
- 452 10. Zacher M, Nguyen-viet TA, Bowers P, Sidorenko J, Linnér RK. Gene discovery and  
453 polygenic prediction from a genome-wide association study of educational attainment in  
454 1.1 million individuals. 2018;50(August).
- 455 11. Morgan GD, Deeds BG, Wargo EM, Gordon JA, Bianchi DW, Riley WT, et al. The  
456 conception of the ABCD study: From substance use to a broad NIH collaboration. *Dev*  
457 *Cogn Neurosci [Internet].* 2017;32(April 2017):4–7. Available from:  
458 <https://doi.org/10.1016/j.dcn.2017.10.002>
- 459 12. Auchter AM, Hernandez Mejia M, Heyser CJ, Shilling PD, Jernigan TL, Brown SA, et al. A  
460 description of the ABCD organizational structure and communication framework. *Dev*  
461 *Cogn Neurosci [Internet].* 2018;32(November 2017):8–15. Available from:  
462 <http://dx.doi.org/10.1016/j.dcn.2018.04.003>
- 463 13. Weintraub S, Dikmen SS, Heaton RK, Tulsky DS, Zelazo PD, Bauer PJ, et al. Cognition  
464 assessment using the NIH Toolbox Cognition assessment using the NIH Toolbox. 2013;
- 465 14. Casaletto KB, Umlauf A, Beaumont J, Gershon R, Slotkin J, Akshoomoff N, et al.  
466 Demographically Corrected Normative Standards for the English Version of the NIH

- 467 Toolbox Cognition Battery. *J Int Neuropsychol Soc.* 2015;21(5):378–91.
- 468 15. Heaton RK, Akshoomoff N, Tulskey D, Mungas D, Weintraub S, Dikmen S, et al. Reliability  
469 and validity of composite scores from the NIH toolbox cognition battery in adults. *J Int*  
470 *Neuropsychol Soc.* 2014;20(6):588–98.
- 471 16. Thompson WK, Barch DM, Bjork JM, Gonzalez R, Nagel BJ, Nixon SJ, et al. The structure of  
472 cognition in 9 and 10 year-old children and associations with problem behaviors: Findings  
473 from the ABCD study’s baseline neurocognitive battery. *Dev Cogn Neurosci* [Internet].  
474 2018;(December):100606. Available from: <https://doi.org/10.1016/j.dcn.2018.12.004>
- 475 17. Raj A, Stephens M, Pritchard JK. FastSTRUCTURE: Variational inference of population  
476 structure in large SNP data sets. *Genetics.* 2014;197(2):573–89.
- 477 18. Das S, Forer L, Schönherr S, Sidore C, Locke AE, Kwong A, et al. Next-generation genotype  
478 imputation service and methods. *Nat Genet* [Internet]. 2016 Aug 29;48:1284. Available  
479 from: <https://doi.org/10.1038/ng.3656>
- 480 19. Euesden J, Lewis CM, O’Reilly PF. PRSice: Polygenic Risk Score software. *Bioinformatics.*  
481 2015;31(9):1466–8.
- 482 20. Martin AR, Gignoux CR, Walters RK, Wojcik GL, Neale BM, Gravel S, et al. Human  
483 Demographic History Impacts Genetic Risk Prediction across Diverse Populations. *Am J*  
484 *Hum Genet* [Internet]. 2017;100(4):635–49. Available from:  
485 <http://dx.doi.org/10.1016/j.ajhg.2017.03.004>
- 486 21. Duncan L, Shen H, Gelaye B, Meijsen J, Ressler K, Feldman M, et al. Analysis of polygenic  
487 risk score usage and performance in diverse human populations. *Nat Commun* [Internet].  
488 2019;10(1). Available from: <http://dx.doi.org/10.1038/s41467-019-11112-0>
- 489 22. Carlson CS, Matise TC, North KE, Haiman CA, Fesinmeyer MD, Buyske S, et al.  
490 Generalization and Dilution of Association Results from European GWAS in Populations  
491 of Non-European Ancestry: The PAGE Study. *PLoS Biol.* 2013;11(9).
- 492 23. Wood S, Scheipl F. gamm4: Generalized additive mixed models using mgcv and lme4. R  
493 package version 0.2-3. 2014.
- 494 24. Imai K, Tingley D, Yamamoto T. Experimental designs for identifying causal mechanisms. *J*  
495 *R Stat Soc Ser A Stat Soc.* 2013;176(1):5–51.
- 496 25. Tingley D, Yamamoto T, Hirose K, Keele L, Imai K. Mediation: R package for causal  
497 mediation analysis. *J Stat Softw.* 2014;59(5):1–38.
- 498 26. Eric Turkheimer. Three laws of behavior genetics and what they mean. *Curr Dir Psychol*  
499 *Sci.* 2000;9(5):160–4.
- 500 27. Genç E, Schlüter C, Fraenz C, Arning L, Metzen D, Nguyen HP, et al. Polygenic Scores for  
501 Cognitive Abilities and their Association with Different Aspects of General Intelligence – a  
502 Deep Phenotyping Approach. *bioRxiv* [Internet]. 2021 Jan 1;2020.06.03.131318. Available  
503 from: <http://biorxiv.org/content/early/2021/03/19/2020.06.03.131318.abstract>
- 504 28. Martin AR, Kanai M, Kamatani Y, Okada Y, Neale BM, Daly MJ. Clinical use of current  
505 polygenic risk scores may exacerbate health disparities. *Nat Genet* [Internet].  
506 2019;51(4):584–91. Available from: <http://dx.doi.org/10.1038/s41588-019-0379-x>
- 507 29. Petrovski S, Goldstein DB. Unequal representation of genetic variation across ancestry  
508 groups creates healthcare inequality in the application of precision medicine. *Genome*  
509 *Biol* [Internet]. 2016;17(1):16–8. Available from: [http://dx.doi.org/10.1186/s13059-016-](http://dx.doi.org/10.1186/s13059-016-1016-y)  
510 1016-y

- 511 30. Krapohl E, Rimfeld K, Shakeshaft NG, Trzaskowski M, McMillan A, Pingault J-B, et al. The  
512 high heritability of educational achievement reflects many genetically influenced traits,  
513 not just intelligence. *Proc Natl Acad Sci [Internet]*. 2014 Oct 21 [cited 2020 Nov  
514 20];111(42):15273–8. Available from: <https://www.pnas.org/content/111/42/15273>  
515  
516

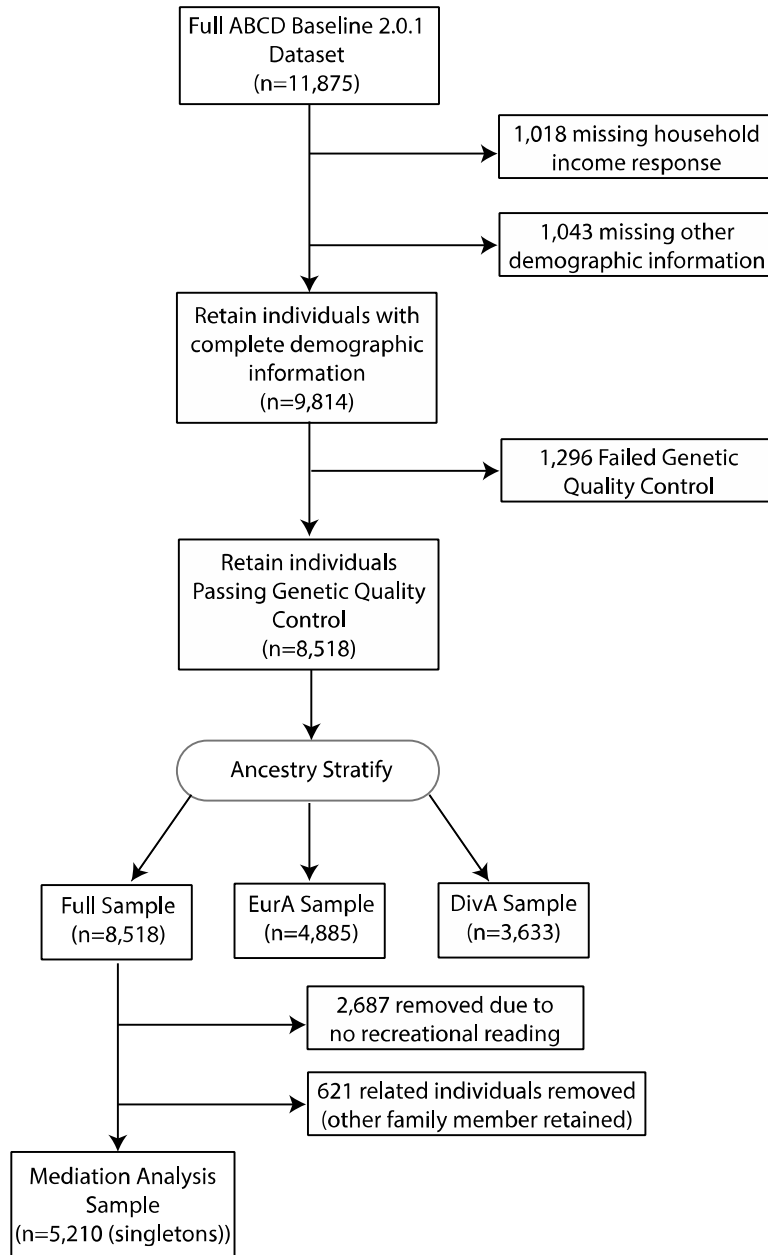

517  
518 Figure 1 *Flow chart of sample selection and exclusion.*

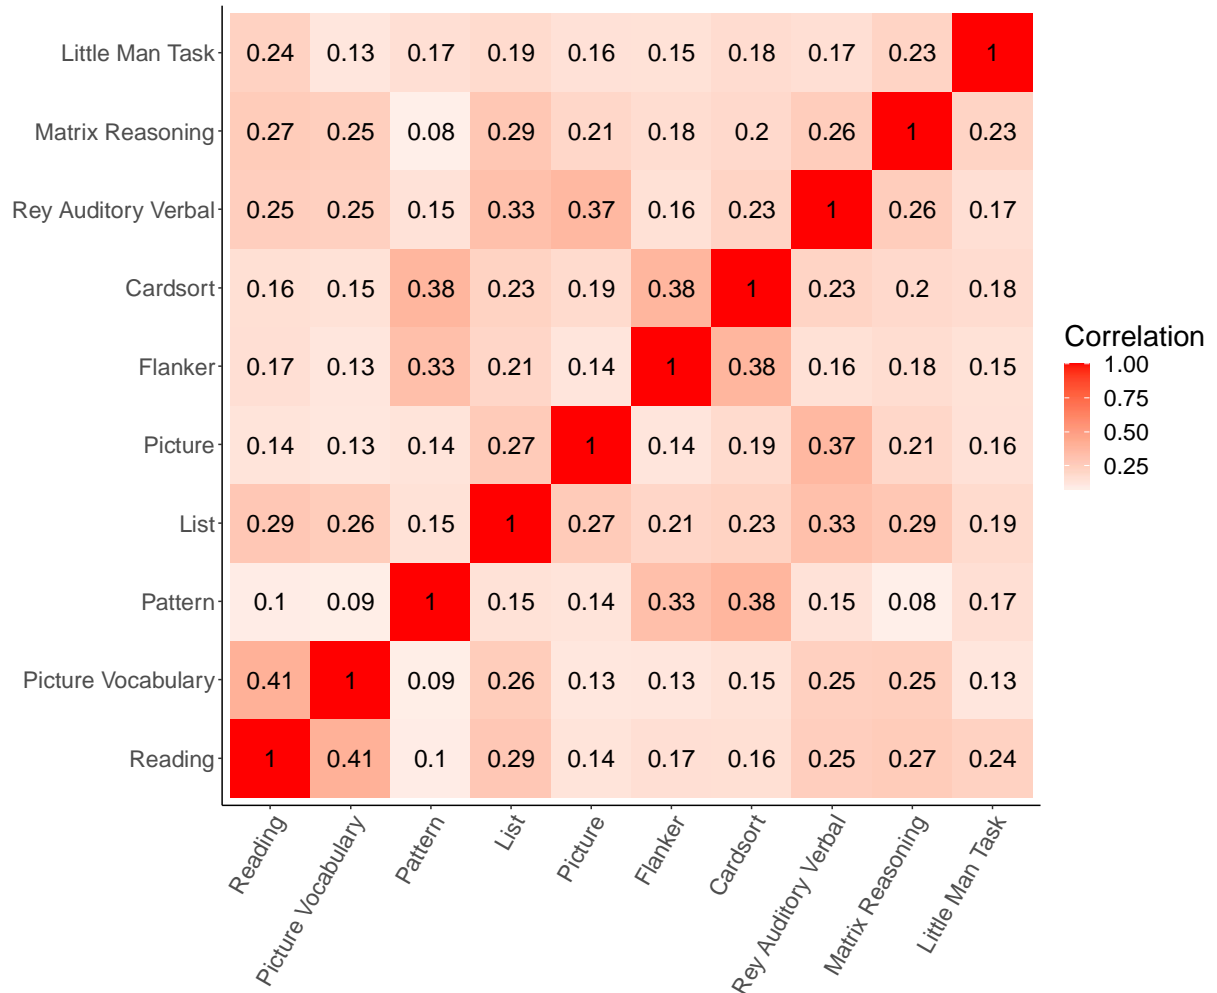

519  
 520 Figure 2 Partial correlation matrix showing intercorrelations among individual task  
 521 performance measures (controlling for age, sex, parental marital status, parental education,  
 522 household income, principal components of genetic ancestry and Hispanic status) in the full  
 523 sample included in the present study of genomic predictors.  
 524

525  
 526  
 527  
 528  
 529

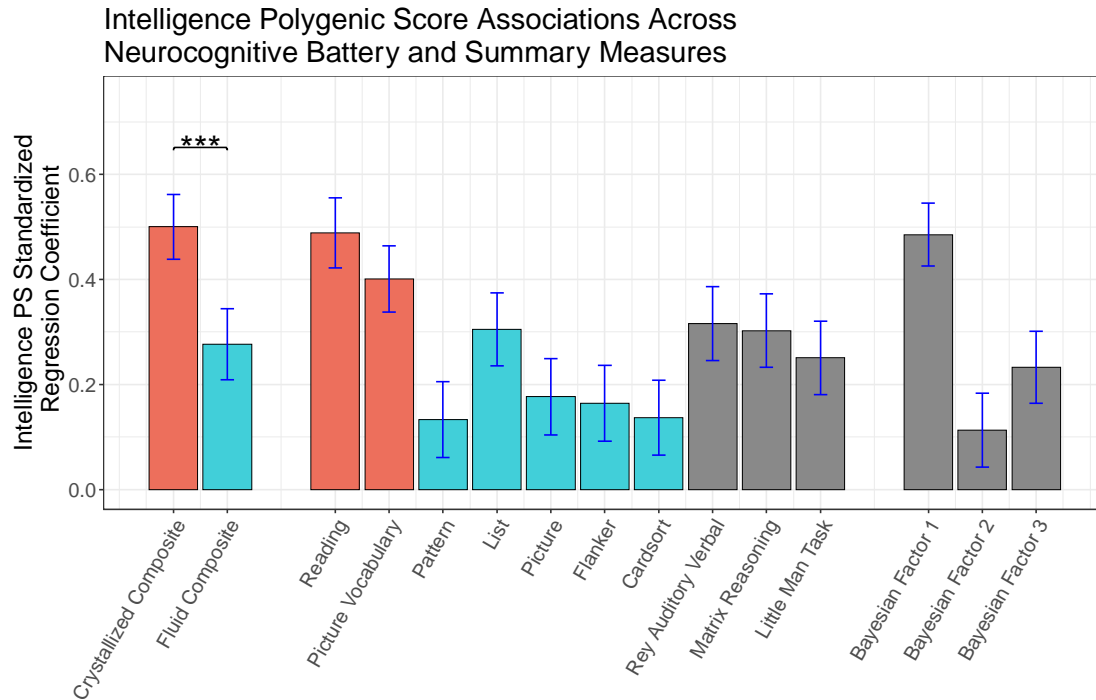

530  
531 Figure 3 Standardized regression coefficients of IPS for fitting linear mixed models to  
532 performance on Fluid and Crystallized Composites, each individual task from the NTCB,  
533 additional measures from the ABCD neurocognitive battery, and Bayesian (latent) Factors 1-3,  
534 in the full sample. Prediction of the Crystallized Composite is significantly stronger than for the  
535 Fluid Composite. Tasks included in the Fluid Composite (shaded in blue) have consistently lower  
536 regression coefficients than those included in the Crystallized Composite (shaded in red).  
537 Additional measures from the neurocognitive battery exhibit associations with IPS more similar  
538 to the Fluid Composite than to the Crystallized Composite, however Bayesian Factor 1, on which  
539 the verbal tasks load heavily, exhibits an association similar to the Crystallized Composite.  
540 Error bars show estimates of 95% confidence intervals as  $1.96 \times$  standard error.  
541



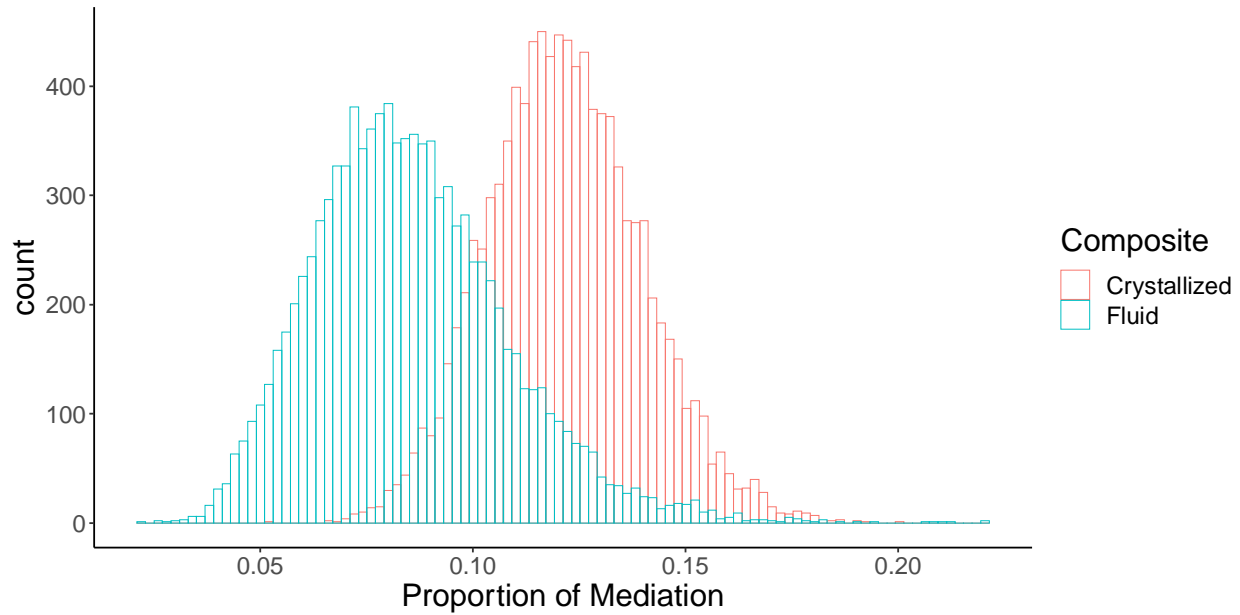

542  
543 Figure 4 *Differential mediation analysis in singletons (N= 5,210): histograms shows 10,000*  
544 *bootstrap estimates for proportion of mediation of recreational reading on: i) IPS and*  
545 *Crystallized Composite (red) and ii) IPS and Fluid Composite (blue). Recreational reading*  
546 *attenuates the relationship between the IPS and the Crystallized Composite to a significantly*  
547 *greater degree.*

548  
549  
550  
551  
552  
553  
554  
555  
556  
557  
558  
559  
560  
561  
562  
563  
564  
565  
566  
567  
568  
569  
570  
571

|                                  | <i>Full Sample</i> | <i>European Ancestry</i> | <i>Other Ancestry</i> |
|----------------------------------|--------------------|--------------------------|-----------------------|
| <b>Total N</b>                   | 8518               | 4885                     | 3633                  |
|                                  | <b>Mean (SD)</b>   |                          |                       |
| <i>Age - months</i>              | 119.05 (7.48)      | 119.21 (7.49)            | 118.85 (7.47)         |
|                                  | <b>N (%)</b>       |                          |                       |
| <i>Sex Male</i>                  | 4438 (52.1)        | 2576 (52.7)              | 1862 (51.3)           |
| <i>Parent Married = Yes</i>      | 6024 (70.7)        | 4066 (83.2)              | 1958 (53.9)           |
| <b>Parental Education</b>        |                    |                          |                       |
| <i>&lt; HS Diploma</i>           | 302 (3.5)          | 21 (0.4)                 | 281 (7.7)             |
| <i>HS Diploma/GED</i>            | 649 (7.6)          | 138 (2.8)                | 511 (14.1)            |
| <i>Some College</i>              | 2149 (25.2)        | 899 (18.4)               | 1250 (34.4)           |
| <i>Bachelor</i>                  | 2318 (27.2)        | 1548 (31.7)              | 770 (21.2)            |
| <i>Post Graduate Degree</i>      | 3100 (36.4)        | 2279 (46.7)              | 821 (22.6)            |
| <b>Household Income</b>          |                    |                          |                       |
| <i>[&lt;50K]</i>                 | 2353 (27.6)        | 596 (12.2)               | 1757 (48.4)           |
| <i>[&gt;=50K &amp; &lt;100K]</i> | 2444 (28.7)        | 1471 (30.1)              | 973 (26.8)            |
| <i>[&gt;=100K]</i>               | 3721 (43.7)        | 2818 (57.7)              | 903 (24.9)            |
| <b>Race</b>                      |                    |                          |                       |
| <i>White</i>                     | 5715 (67.7)        | 4750 (97.4)              | 965 (27.1)            |
| <i>Black</i>                     | 1129 (13.4)        | 1 (0.0)                  | 1128 (31.7)           |
| <i>Asian</i>                     | 199 (2.4)          | 0 (0.0)                  | 199 (5.6)             |
| <i>Other</i>                     | 1397 (16.6)        | 128 (2.6)                | 1269 (35.6)           |
| <b>Hispanic</b>                  |                    |                          |                       |
| <i>Hispanic</i>                  | 1628 (19.1)        | 131 (2.7)                | 1497 (41.2)           |

572  
573  
574  
575  
576  
577  
578  
579  
580  
581  
582  
583  
584  
585  
586  
587  
588

*Table 1: Summary of demographics for individuals included in the full sample for the present genomic prediction analyses, and for the genomic European Ancestry and genomic Other Ancestry subgroups.*

589

|                              | Mean (SD)      | Median | Sex  | Age  | Sociocultural |
|------------------------------|----------------|--------|------|------|---------------|
| Crystallized Composite       | 86.87 (6.93)   | 87     | 0.01 | 9.51 | 21.57         |
| Fluid Composite              | 92.18 (10.43)  | 93     | 0.32 | 7.17 | 10.28         |
| Reading                      | 91.23 (6.73)   | 91     | 0.01 | 5.97 | 13.18         |
| Picture Vocabulary           | 85.04 (8.02)   | 84     | 0.07 | 7.67 | 20.14         |
| Pattern                      | 88.29 (14.47)  | 88     | 0.57 | 4.81 | 1.90          |
| List                         | 97.43 (11.81)  | 97     | 0.13 | 2.04 | 9.47          |
| Picture                      | 103.33 (12.01) | 103    | 0.51 | 1.17 | 5.46          |
| Flanker                      | 94.42 (8.83)   | 96     | 0.03 | 3.21 | 3.73          |
| Cardsort                     | 92.97 (9.26)   | 94     | 0.48 | 3.76 | 5.22          |
| Rey Auditory Verbal          | 43.78 (9.96)   | 44     | 1.25 | 2.23 | 8.57          |
| Matrix Reasoning             | 18.13 (3.74)   | 18     | 0.34 | 2.74 | 9.15          |
| Little Man Task              | 0.60 (0.17)    | 0.56   | 0.48 | 5.13 | 6.25          |
| Bayesian Factor 1            | 0.05 (0.76)    | 0.06   | 0.28 | 9.63 | 20.85         |
| Bayesian Factor 2            | 0.02 (0.76)    | 0.06   | 0.22 | 5.49 | 2.65          |
| Bayesian Factor 3            | 0.04 (0.70)    | 0.04   | 0.89 | 1.59 | 7.83          |
| Recreational Reading (hours) | 6.5 (10)       | 4      | 0.45 | 0.18 | 0.86          |

590 *Table 2 Mean (SD) and median for each behavioral measure in the full sample, estimated % variance explained by sex, age, and*  
 591 *the set of socio-cultural covariates (parental marital status, parental education, household income, genetic ancestry PCs and*  
 592 *Hispanic/non-Hispanic).*

593  
 594  
 595  
 596  
 597  
 598  
 599  
 600

| Sample      | Fluid Composite |      |          |                  | Crystallized Composite |       |          |                 |
|-------------|-----------------|------|----------|------------------|------------------------|-------|----------|-----------------|
|             | Stand. $\beta$  | t    | P value  | % Var. Explained | Stand. $\beta$         | t     | P value  | % Var Explained |
|             | IPS             |      |          |                  |                        |       |          |                 |
| Full Sample | 0.28            | 8.03 | 1.14E-15 | 0.75             | 0.50                   | 15.82 | 1.31E-55 | 2.86            |
| EurA        | 0.11            | 7.53 | 6.10E-14 | 1.15             | 0.21                   | 14.48 | 1.44E-46 | 4.13            |
| DivA        | 0.20            | 3.41 | 6.52E-04 | 0.32             | 0.40                   | 7.34  | 2.68E-13 | 1.47            |
|             | EAPS            |      |          |                  |                        |       |          |                 |
| Full Sample | 0.11            | 7.23 | 5.26E-13 | 0.61             | 0.19                   | 14.21 | 2.56E-45 | 2.32            |
| EurA        | 0.09            | 6.60 | 4.66E-11 | 0.89             | 0.18                   | 12.95 | 9.36E-38 | 3.34            |
| DivA        | 0.08            | 3.38 | 7.28E-04 | 0.32             | 0.15                   | 6.66  | 3.24E-11 | 1.21            |

601 *Table 3 Regression results for GLMMs associating IPS (top) and EAPS (bottom) with Crystallized Composite and Fluid*  
 602 *Composite of the NIH toolbox within full Sample and ancestry subgroups.*
